# Supplementary material
Source: publisher site journal article supplement (https://www.dovepress.com/article/432331)
Supplement: Supplementary file 1 [file get_supplementary_file.php]

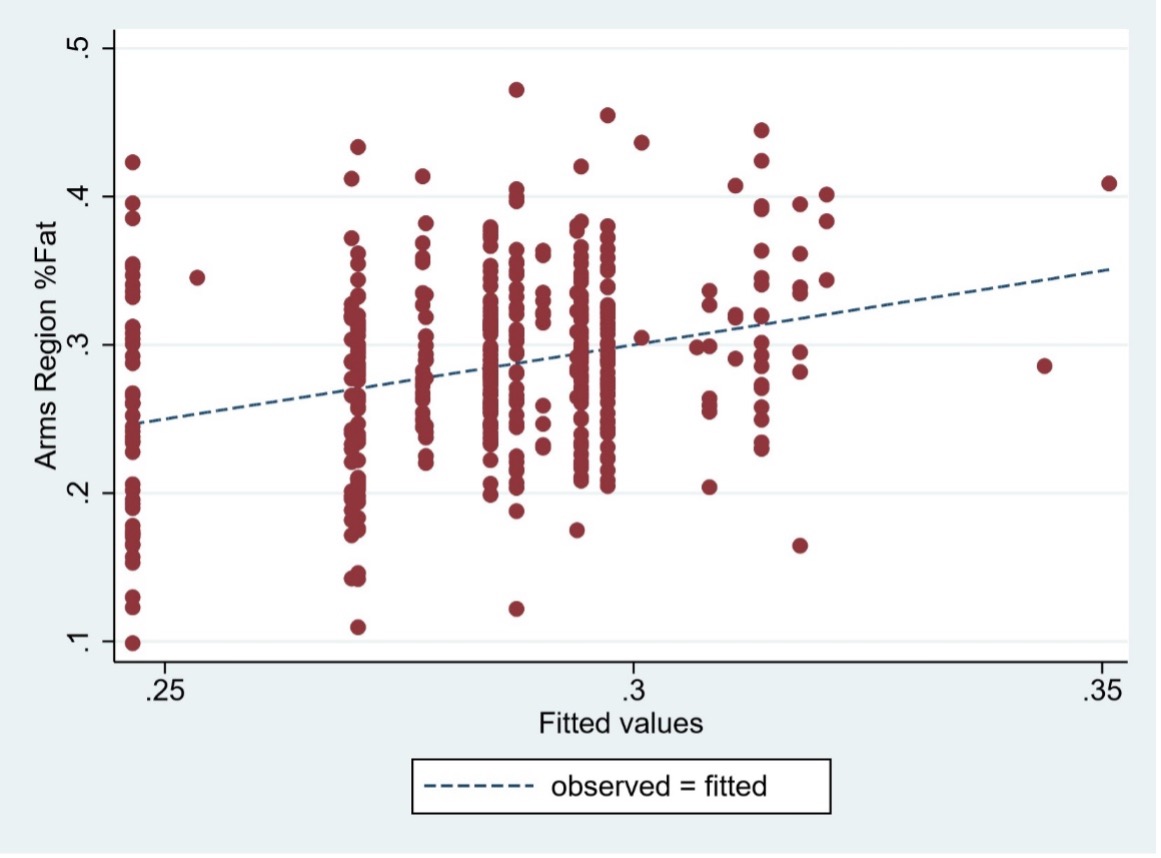


Supplemental Figure 1: Observed versus fitted regression values for arms region fat in males


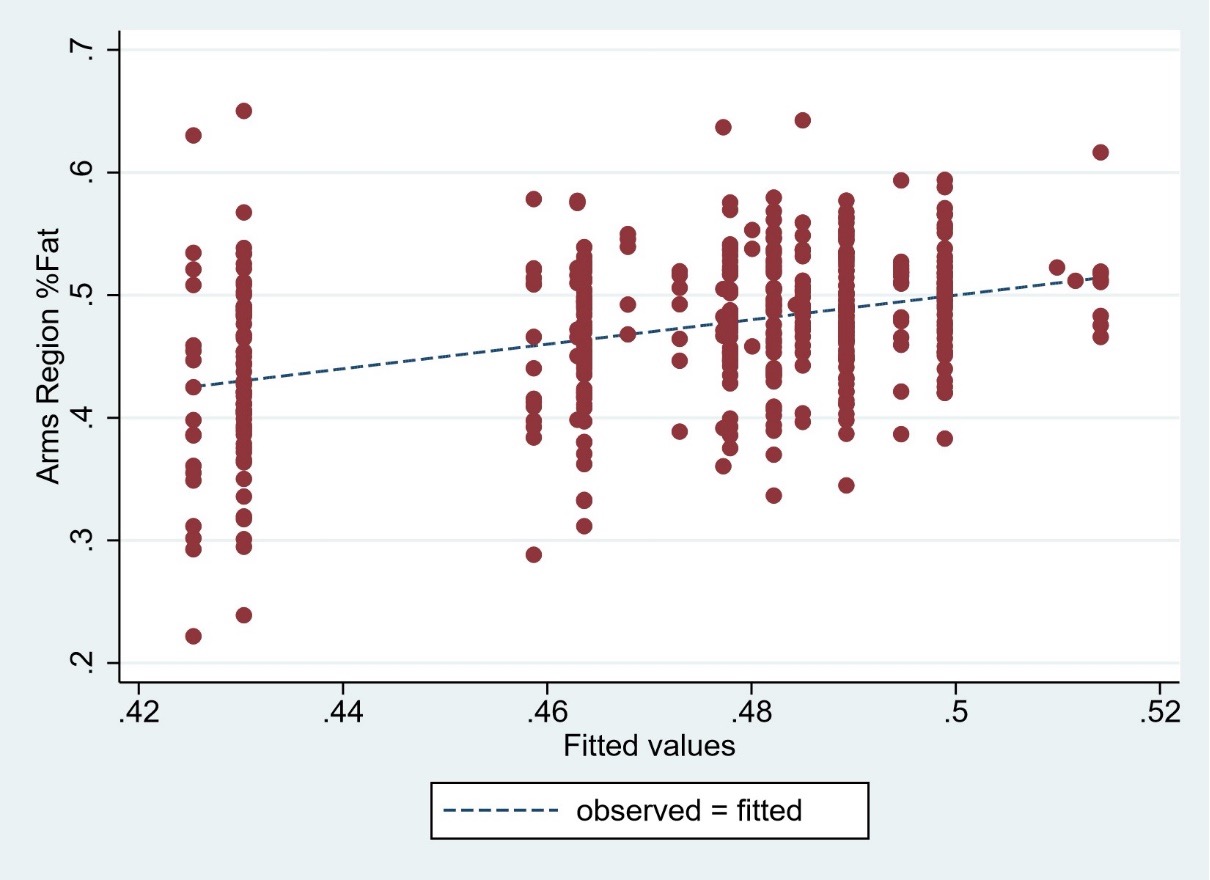


Supplemental Figure 2: Observed versus fitted regression values for arms region fat in females


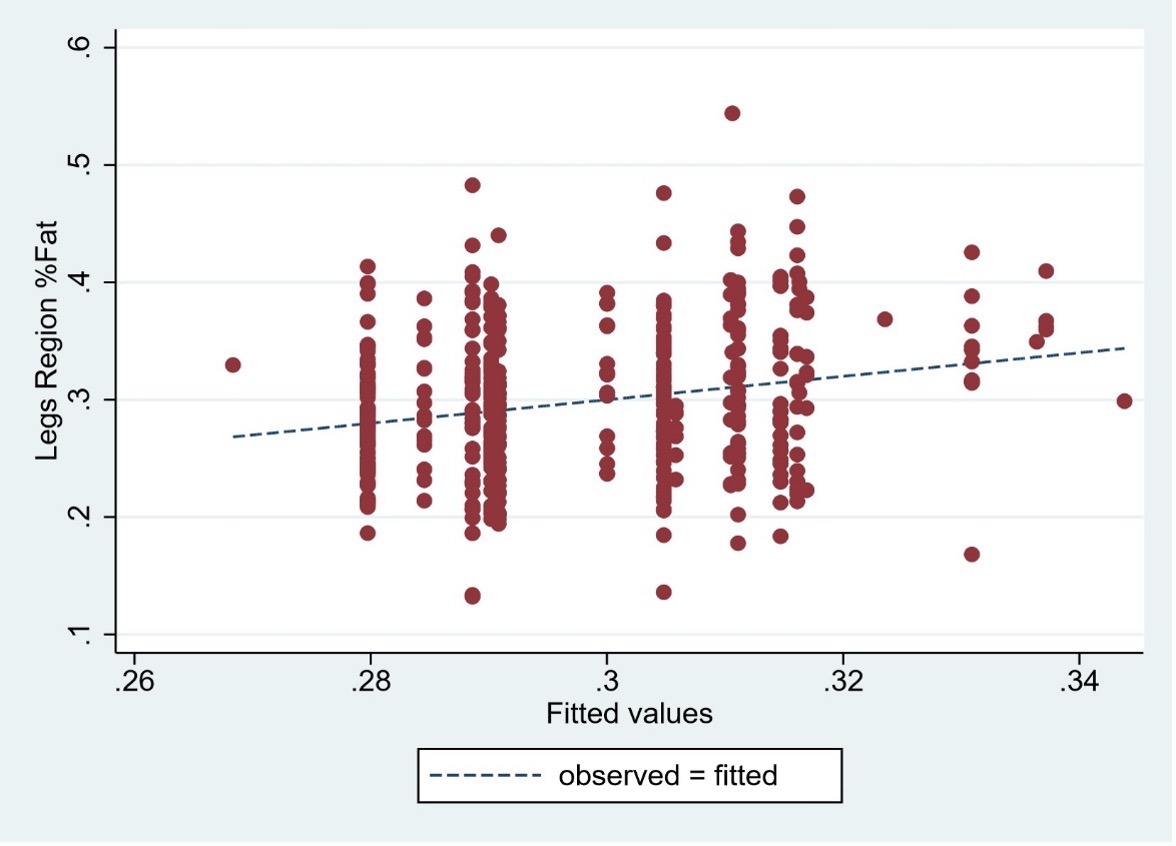


Supplemental Figure 3: Observed versus fitted regression values for legs region fat in males


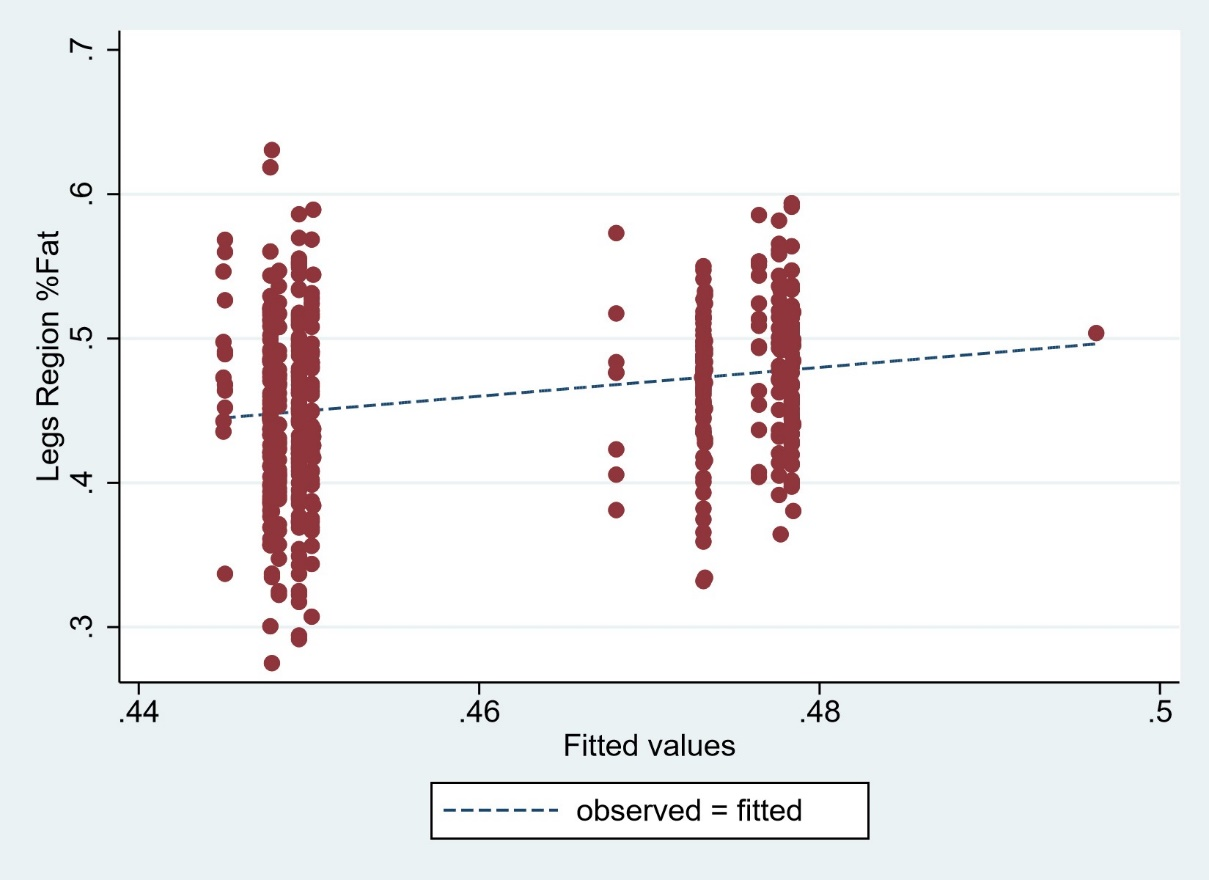


Supplemental Figure 4: Observed versus fitted regression values for legs region fat in females


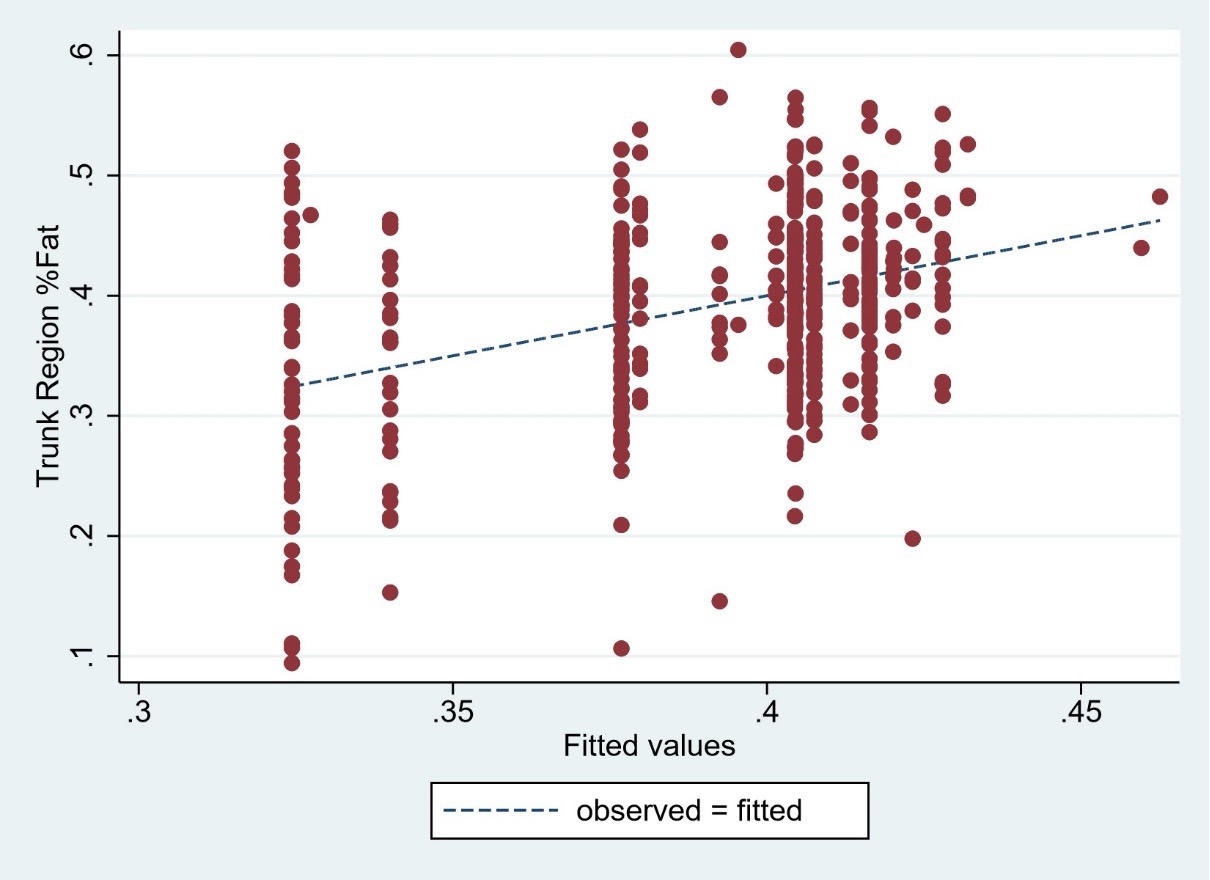


Supplemental Figure 5: Observed versus fitted regression values for trunk region fat in males


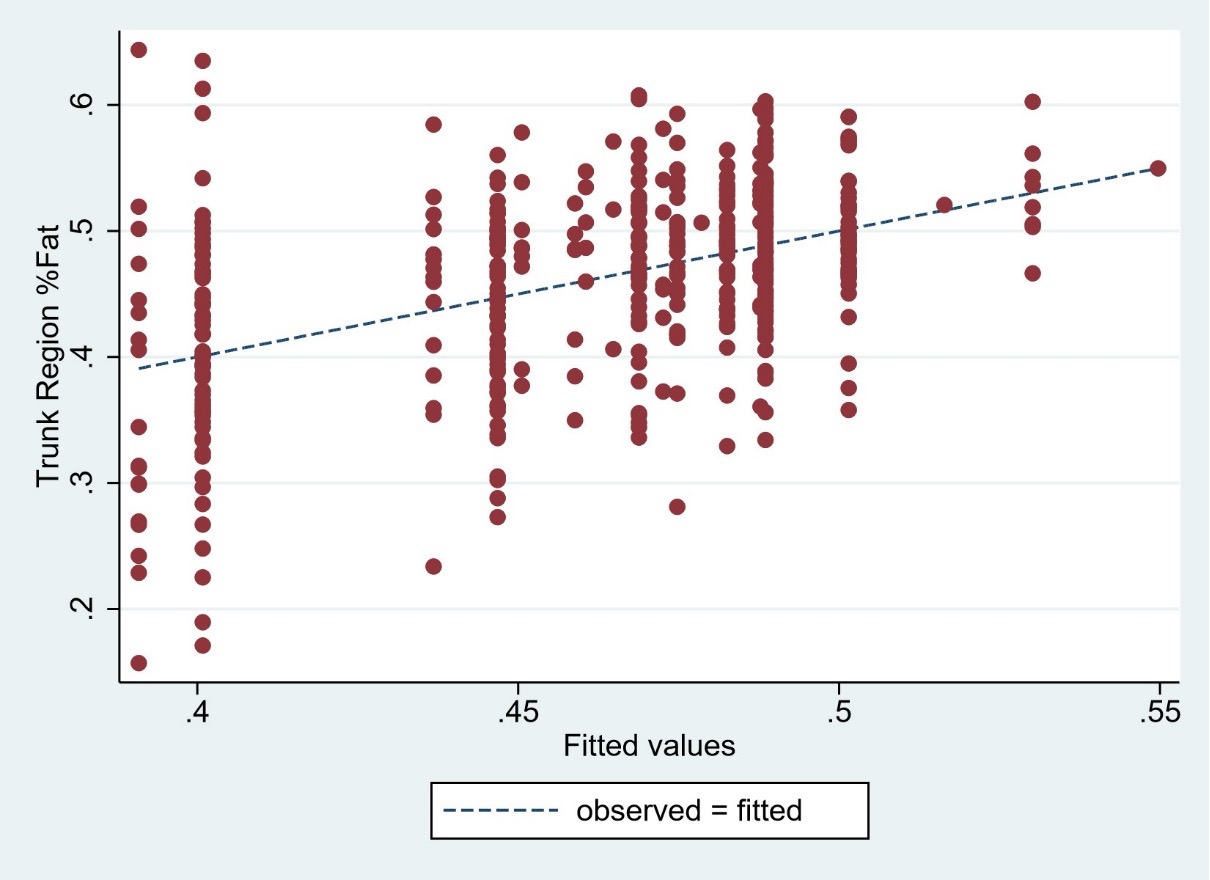


Supplemental Figure 6: Observed versus fitted regression values for trunk region fat in females


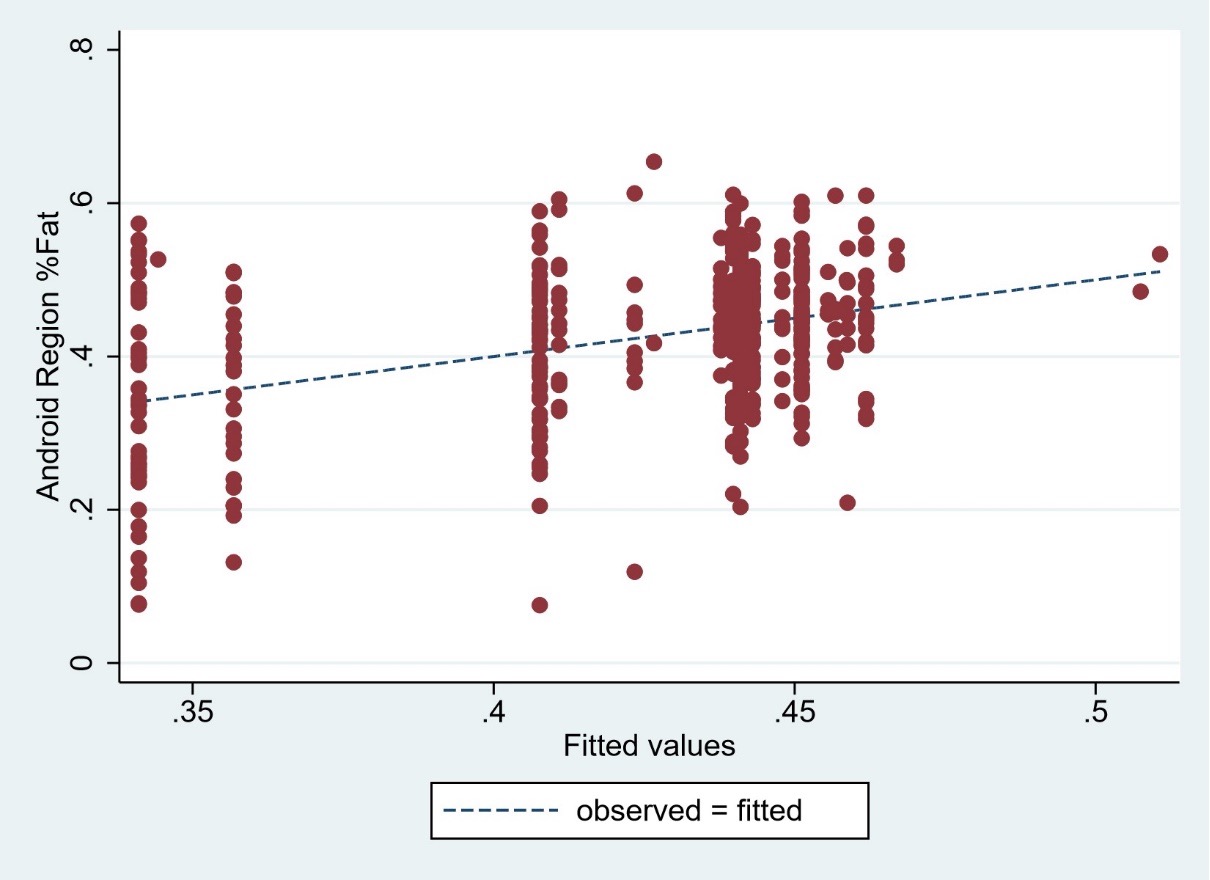


Supplemental Figure 7: Observed versus fitted regression values for android region fat in males


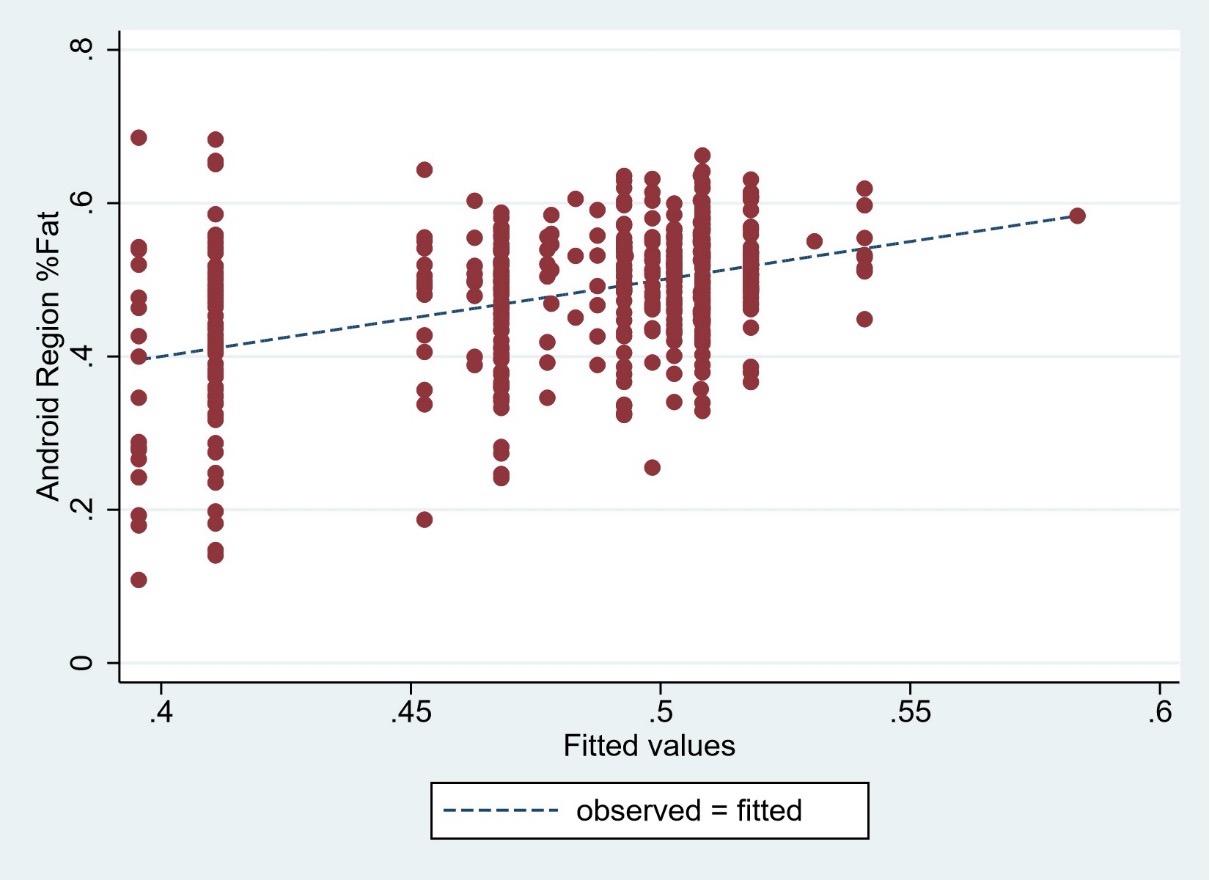


Supplemental Figure 8: Observed versus fitted regression values for android region fat in females


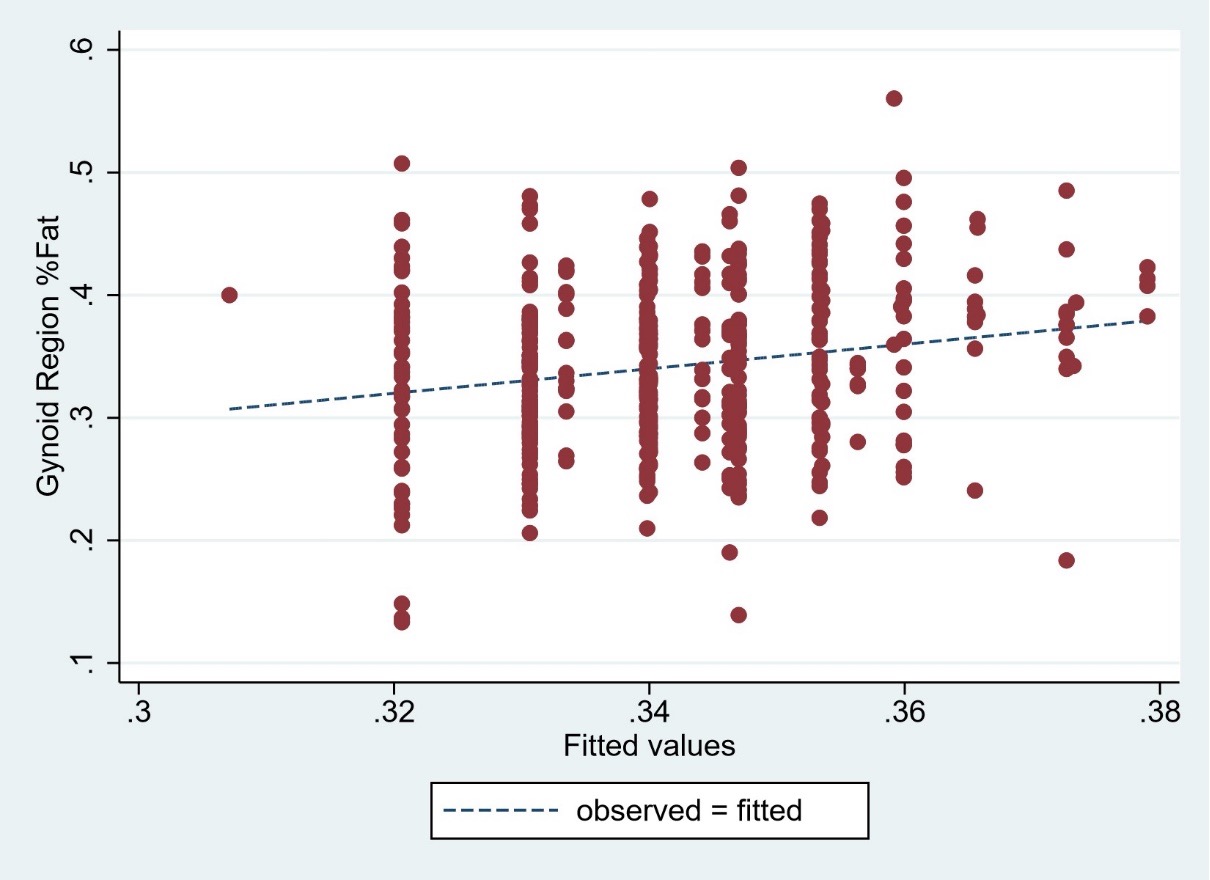


Supplemental Figure 9: Observed versus fitted regression values for gynoid region fat in males


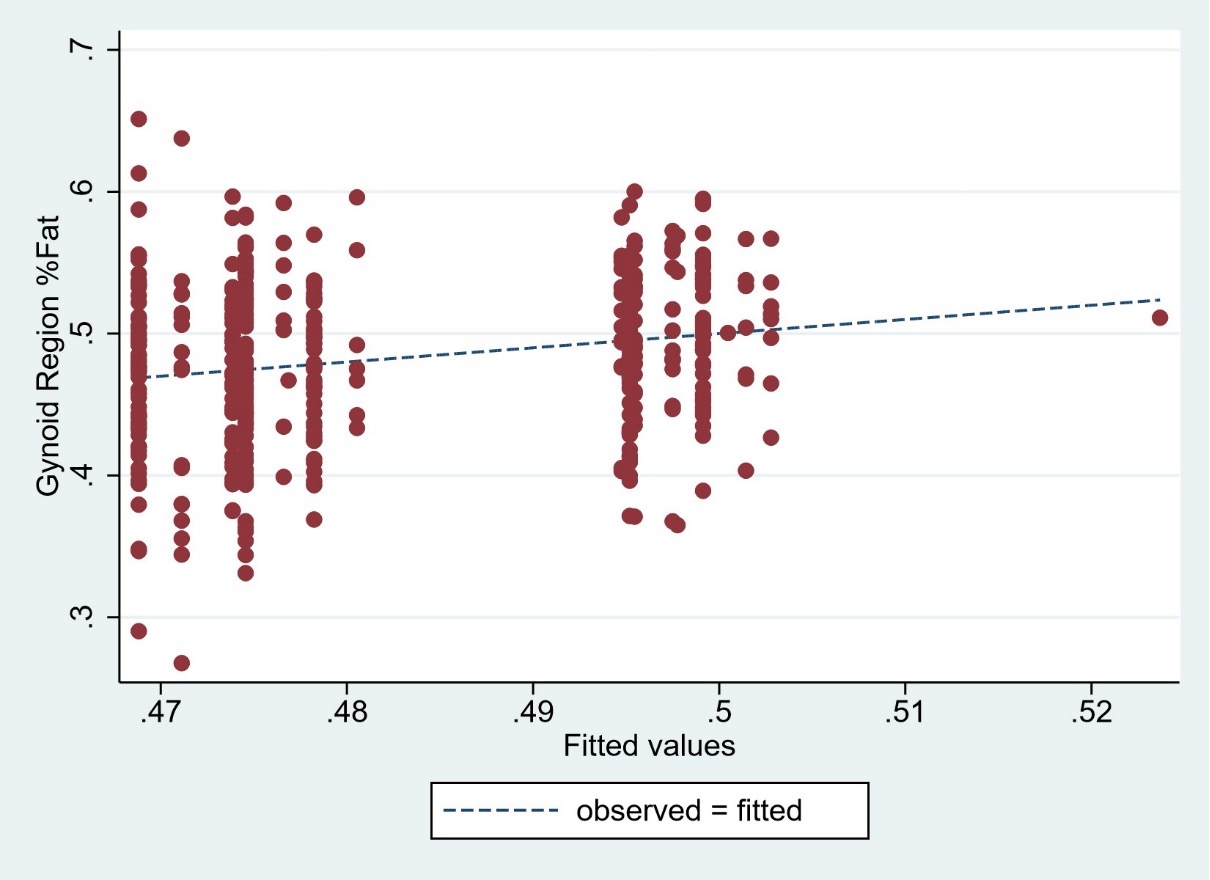


Supplemental Figure 10: Observed versus fitted regression values for gynoid region fat in females


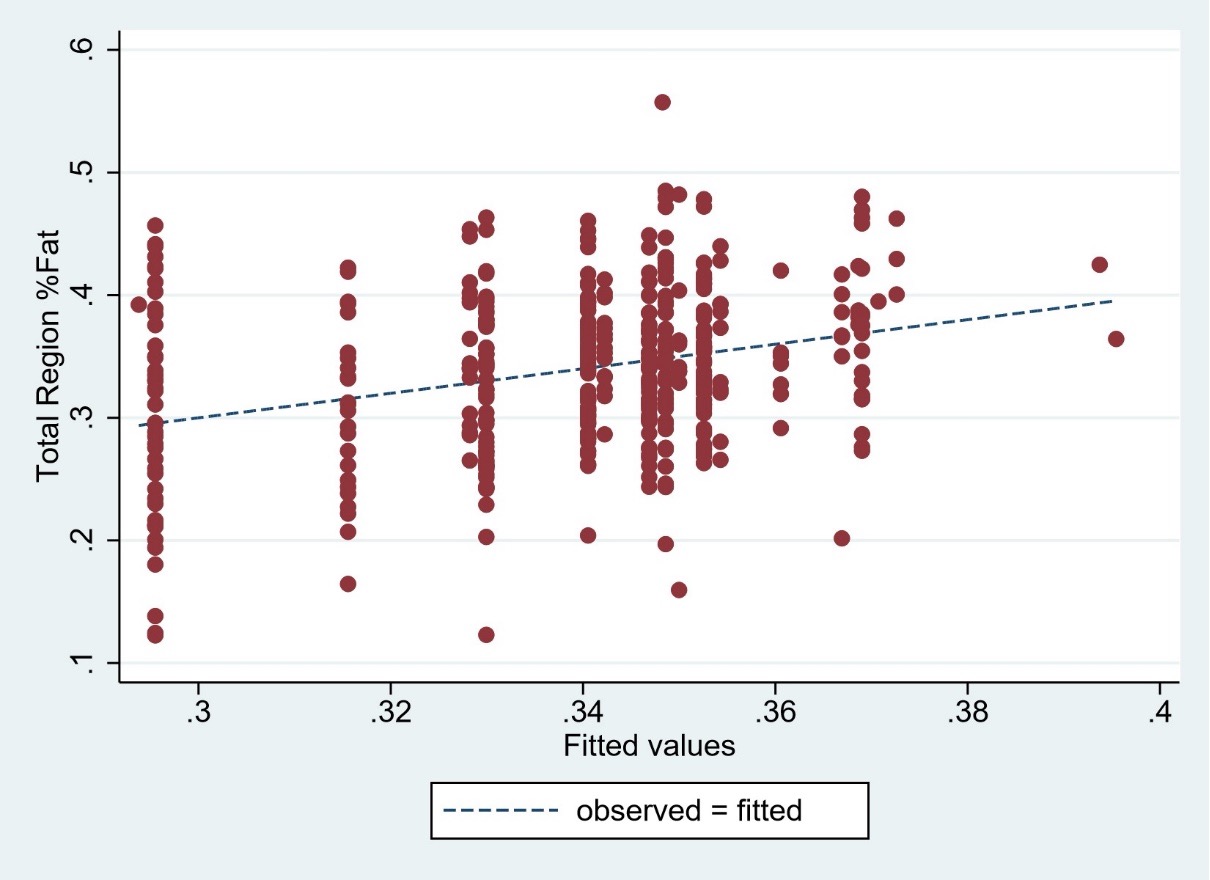


Supplemental Figure 11: Observed versus fitted regression values for total region fat in males


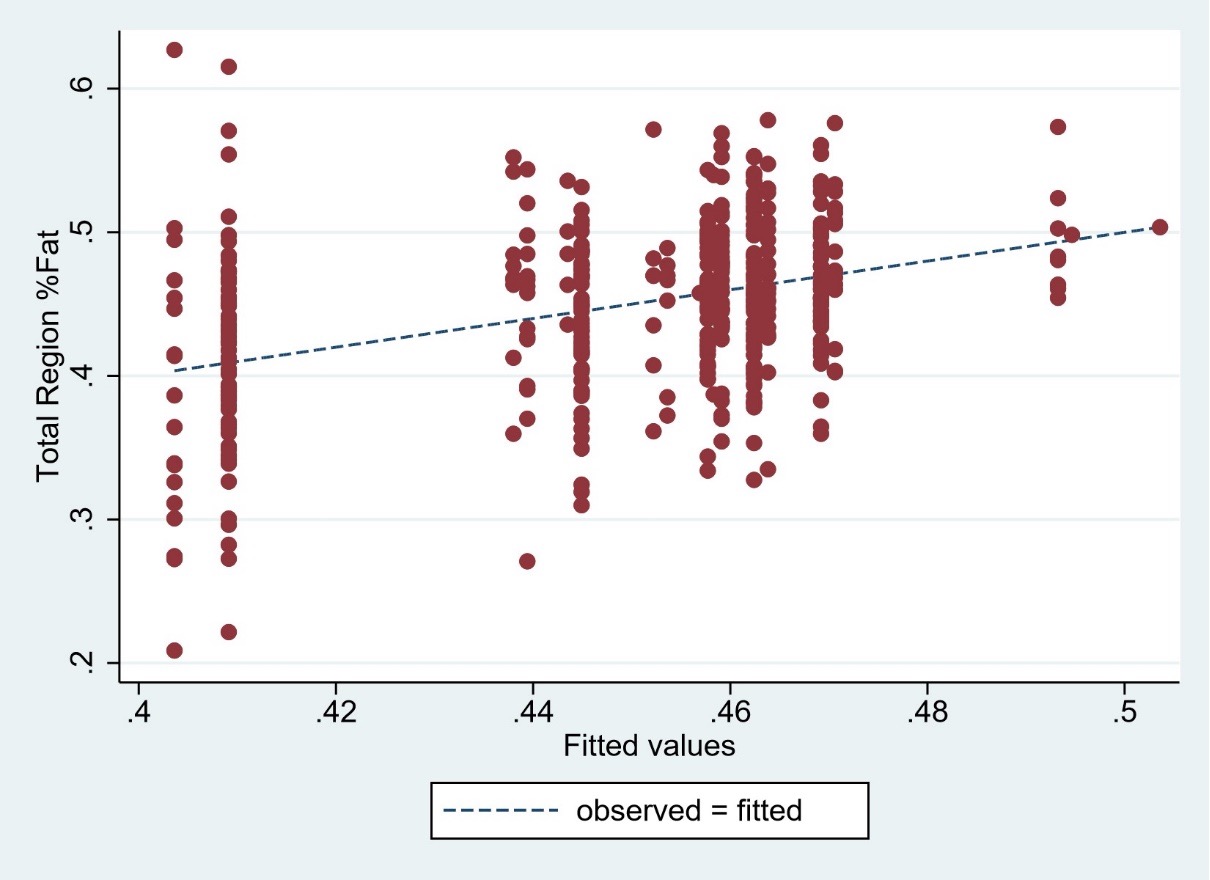


Supplemental Figure 12: Observed versus fitted regression values for total region fat in females


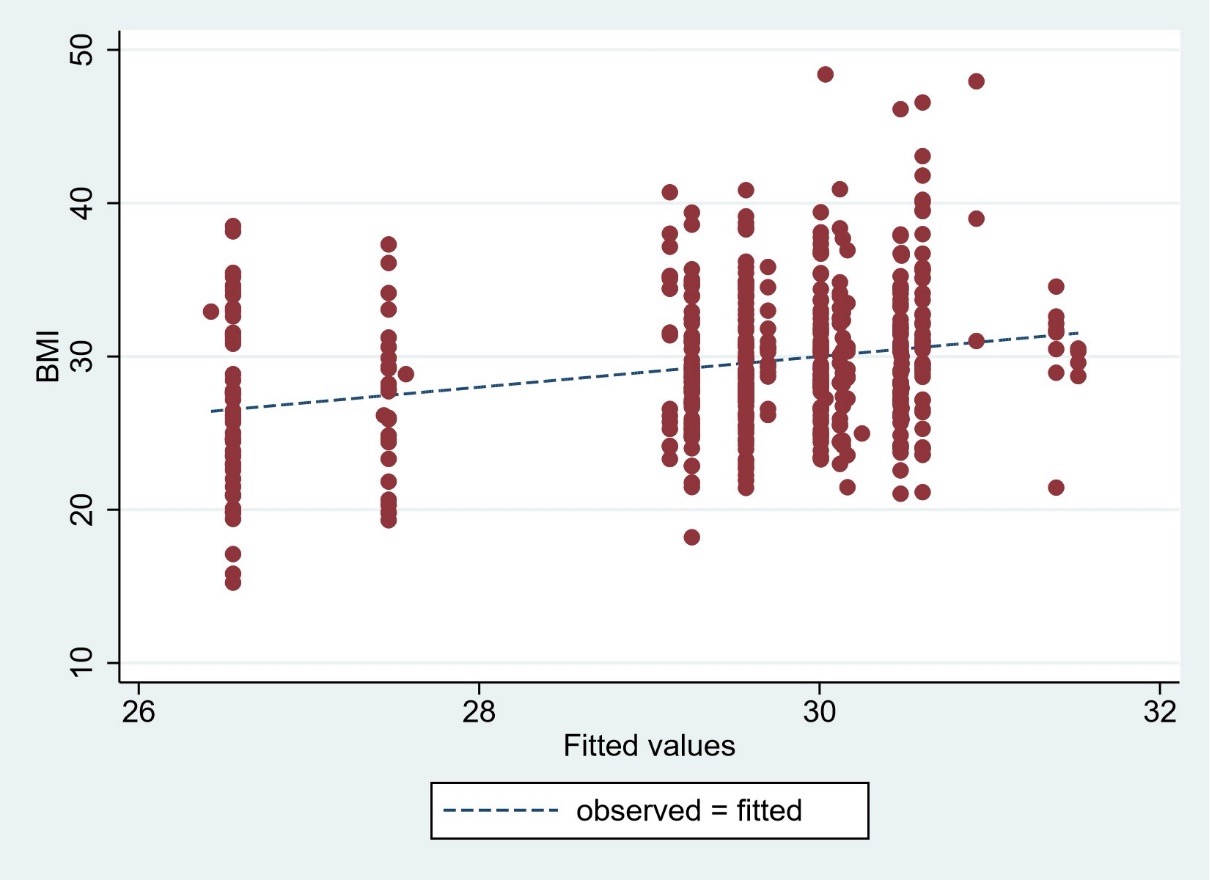


Supplemental Figure 13: Observed versus fitted regression values for BMI in males


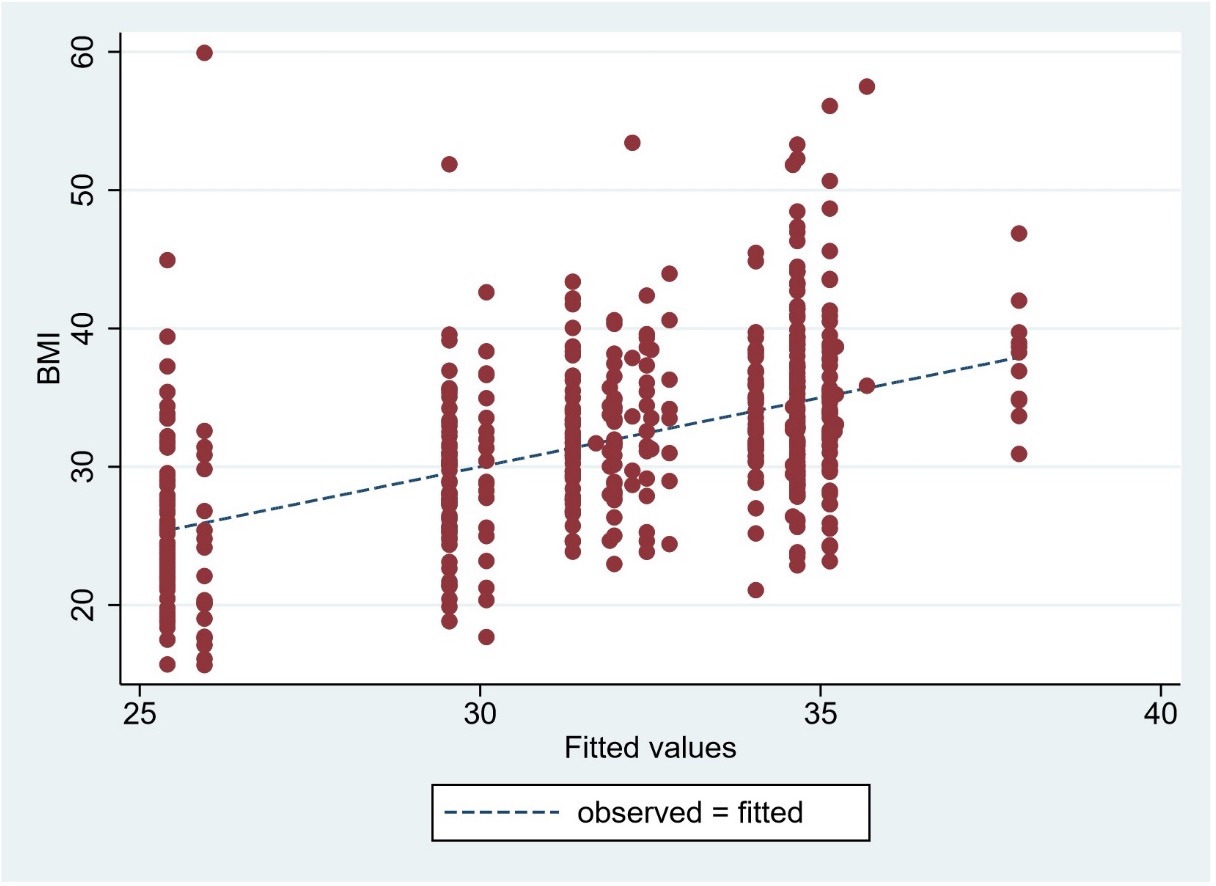


Supplemental Figure 14: Observed versus fitted regression values for BMI in females


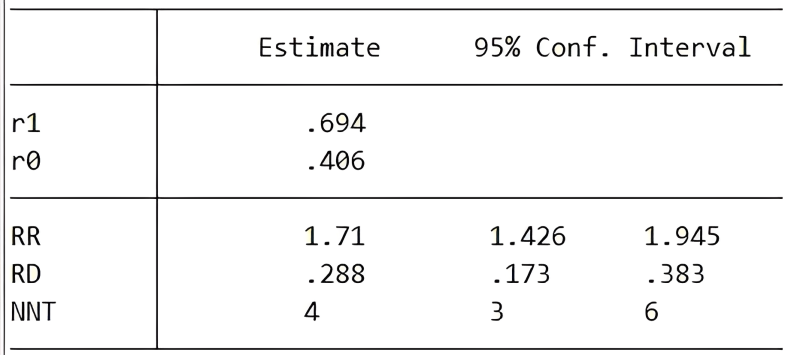


Supplemental Figure 15: Risk having high Waist hip ratio in diabetic in males


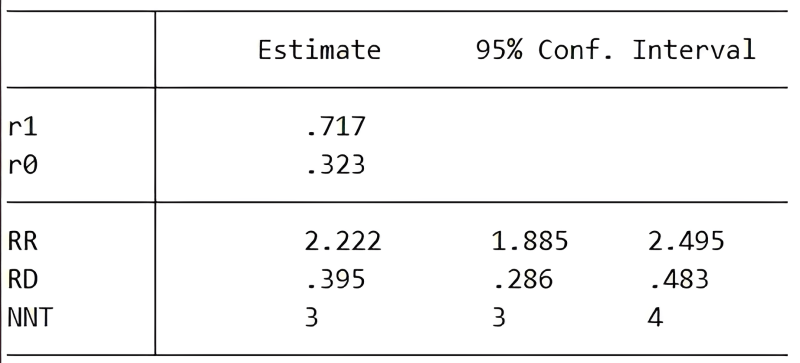


Supplemental Figure 16: Risk having high Waist hip ratio in diabetic in females


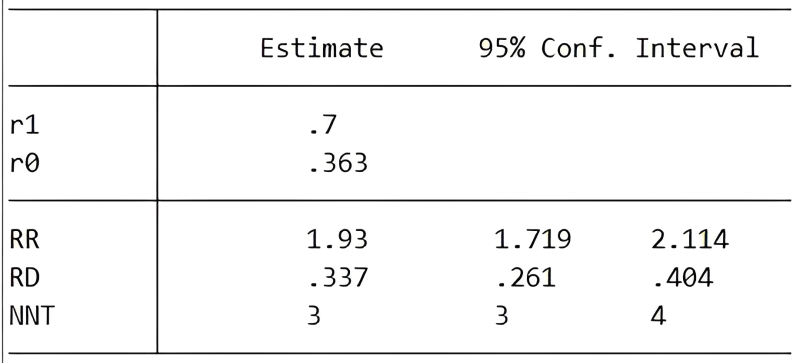


Supplemental Figure 17: Risk having high Waist hip ratio in diabetic combined for both genders
